# Supplementary material
Source: publisher site journal article supplement (https://www.dovepress.com/article/364352)
Supplement: Supplementary file 1 [file get_supplementary_file.php]

1 **Supplementary materials**

2

3 **Supplementary Table 1. The catalog number and purity of standards.**

4

| <b>NO.</b> | <b>Compound name</b> | <b>Catalog No.</b> | <b>Purity</b> |
|------------|----------------------|--------------------|---------------|
| 1          | Ginsenoside Rb1      | 41753-43-9         | 99.32% (HPLC) |
| 2          | Ginsenoside Rg1      | 22427-39-0         | 98.65% (HPLC) |
| 3          | Ginsenoside Re       | 52286-59-6         | 99.26% (HPLC) |
| 4          | Ophiopogonin D       | 945619-74-9        | 99.80% (HPLC) |
| 5          | Ophiopogonin D'      | 65604-80-0         | 99.71% (HPLC) |

5

**Supplementary Table 2. Detail information of material medica from Shenmai injection**

| No | Herb | Ingredient                                                                                                                                                                                  | Formula                                         | CAS NO.    |
|----|------|---------------------------------------------------------------------------------------------------------------------------------------------------------------------------------------------|-------------------------------------------------|------------|
| 1  | HS   | Arachic acid                                                                                                                                                                                | C <sub>20</sub> H <sub>40</sub> O <sub>2</sub>  | 506-30-9   |
| 2  | HS   | beta-caryophyllene                                                                                                                                                                          | C <sub>15</sub> H <sub>24</sub>                 | 87-44-5    |
| 3  | HS   | alloaromadendrene                                                                                                                                                                           | C <sub>15</sub> H <sub>24</sub>                 | 25246-27-9 |
| 4  | HS   | palmitic acid                                                                                                                                                                               | C <sub>16</sub> H <sub>32</sub> O <sub>2</sub>  | 57-10-3    |
| 5  | HS   | alpha-Guaiene                                                                                                                                                                               | C <sub>15</sub> H <sub>24</sub>                 | 3691-12-1  |
| 6  | HS   | ()-Aromadendrene                                                                                                                                                                            | C <sub>15</sub> H <sub>24</sub>                 | 489-39-4   |
| 7  | HS   | beta-sitosterol                                                                                                                                                                             | C <sub>29</sub> H <sub>50</sub> O               | 83-46-5    |
| 8  | HS   | Nonacosane                                                                                                                                                                                  | C <sub>29</sub> H <sub>60</sub>                 | 630-03-5   |
| 9  | HS   | delta-amorphene                                                                                                                                                                             | C <sub>15</sub> H <sub>24</sub>                 | 16729-01-4 |
| 10 | HS   | 58924_FLUKA                                                                                                                                                                                 | C <sub>15</sub> H <sub>24</sub>                 | 1135-66-6  |
| 11 | HS   | Cedrol                                                                                                                                                                                      | C <sub>15</sub> H <sub>26</sub> O               | 77-53-2    |
| 12 | HS   | beta-elemene                                                                                                                                                                                | C <sub>15</sub> H <sub>24</sub>                 | 33880-83-0 |
| 13 | HS   | (1S,2S)-2-isopropenyl-4-isopropylidene-1-methyl-1-vinylcyclohexane                                                                                                                          | C <sub>15</sub> H <sub>24</sub>                 | 30824-67-0 |
| 14 | HS   | myristic acid                                                                                                                                                                               | C <sub>14</sub> H <sub>28</sub> O <sub>2</sub>  | 544-63-8   |
| 15 | HS   | PENTADECYLIC ACID                                                                                                                                                                           | C <sub>15</sub> H <sub>30</sub> O <sub>2</sub>  | 1002-84-2  |
| 16 | HS   | HEXACOSANE                                                                                                                                                                                  | C <sub>26</sub> H <sub>54</sub>                 | 630-01-3   |
| 17 | HS   | Octacosane                                                                                                                                                                                  | C <sub>28</sub> H <sub>58</sub>                 | 630-02-4   |
| 18 | HS   | Daturic acid                                                                                                                                                                                | C <sub>17</sub> H <sub>34</sub> O <sub>2</sub>  | 506-12-7   |
| 19 | HS   | Piperonal                                                                                                                                                                                   | C <sub>8</sub> H <sub>6</sub> O <sub>3</sub>    | 120-57-0   |
| 20 | HS   | zoomaric acid                                                                                                                                                                               | C <sub>16</sub> H <sub>30</sub> O <sub>2</sub>  | 373-49-9   |
| 21 | HS   | Tetracosane                                                                                                                                                                                 | C <sub>24</sub> H <sub>50</sub>                 | 211-474-5  |
| 22 | HS   | panaxynol                                                                                                                                                                                   | C <sub>17</sub> H <sub>24</sub> O               | 21852-80-2 |
| 23 | HS   | DNOP                                                                                                                                                                                        | C <sub>24</sub> H <sub>38</sub> O <sub>4</sub>  | 117-84-0   |
| 24 | HS   | HEPTACOSANE                                                                                                                                                                                 | C <sub>27</sub> H <sub>56</sub>                 | 593-49-7   |
| 25 | HS   | (6Z,10E,14E,18E)-2,6,10,15,19,23-hexamethyltetracosane                                                                                                                                      | C <sub>30</sub> H <sub>50</sub>                 | 7683-64-9  |
| 26 | HS   | Vetol                                                                                                                                                                                       | C <sub>6</sub> H <sub>6</sub> O <sub>3</sub>    | 118-71-8   |
| 27 | HS   | spathulenol                                                                                                                                                                                 | C <sub>15</sub> H <sub>24</sub> O               | 6750-60-3  |
| 28 | HS   | Coumaran                                                                                                                                                                                    | C <sub>8</sub> H <sub>8</sub> O                 | 496-16-2   |
| 29 | HS   | ginsenoside-Rh1                                                                                                                                                                             | C <sub>36</sub> H <sub>62</sub> O <sub>9</sub>  | 63223-86-9 |
| 30 | HS   | ginsenoside-Rh1_qt                                                                                                                                                                          | C <sub>36</sub> H <sub>62</sub> O <sub>9</sub>  | 80952-71-2 |
| 31 | HS   | 20(S)-Ginsenoside-Rh1_qt                                                                                                                                                                    | C <sub>42</sub> H <sub>72</sub> O <sub>13</sub> | 80952-72-3 |
| 32 | HS   | (3S,5R,6S,8R,9R,10R,12R,13R,14R,17S)-17-[(2S)-2-hydroxy-6-methylhept-5-en-2-yl]-4,4,8,10,14-pentamethyl-2,3,5,6,7,9,11,12,13,15,16,17-dodecahydro-1H-cyclopenta[a]phenanthrene-3,6,12-triol | C <sub>30</sub> H <sub>52</sub> O <sub>4</sub>  | 34080-08-5 |

|    |    |                                                                                                                                                                                                                                                                 |                                                  |            |
|----|----|-----------------------------------------------------------------------------------------------------------------------------------------------------------------------------------------------------------------------------------------------------------------|--------------------------------------------------|------------|
| 33 | HS | 20(R)-ginsenoside Rg2                                                                                                                                                                                                                                           | C <sub>42</sub> H <sub>72</sub> O <sub>13</sub>  | 80952-72-3 |
| 34 | HS | ginsenoside Rb1                                                                                                                                                                                                                                                 | C <sub>54</sub> H <sub>92</sub> O <sub>23</sub>  | 41753-43-9 |
| 35 | HS | (3R,5R,8R,9R,10R,12R,13R,14R,17S)-17-[(2S)-2-hydroxy-6-methylhept-5-en-2-yl]-4,4,8,10,14-pentamethyl-2,3,5,6,7,9,11,12,13,15,16,17-dodecahydro-1H-cyclopenta[a]phenanthrene-3,12-diol                                                                           | C <sub>54</sub> H <sub>92</sub> O <sub>23</sub>  | 41753-43-9 |
| 36 | HS | ginsenoside-Rb2                                                                                                                                                                                                                                                 | C <sub>53</sub> H <sub>90</sub> O <sub>22</sub>  | 11021-13-9 |
| 37 | HS | (3S,5R,8R,9R,10R,12R,13R,14R,17S)-17-[(2S)-2-hydroxy-6-methylhept-5-en-2-yl]-4,4,8,10,14-pentamethyl-2,3,5,6,7,9,11,12,13,15,16,17-dodecahydro-1H-cyclopenta[a]phenanthrene-3,12-diol                                                                           | C <sub>30</sub> H <sub>52</sub> O <sub>3</sub>   | 30636-90-9 |
| 38 | HS | ginsenoside-Rc                                                                                                                                                                                                                                                  | C <sub>53</sub> H <sub>90</sub> O <sub>22</sub>  | 11021-14-0 |
| 39 | HS | (2S,3R,4S,5S,6R)-2-[(2S)-2-[(3S,5R,8R,9R,10R,12R,13R,14R,17S)-3-[(2R,3R,4S,5S,6R)-4,5-dihydroxy-6-(hydroxymethyl)-3-[(2S,3R,4S,5S,6R)-3,4,5-trihydroxy-6-(hydroxymethyl)oxan-2-yl]oxyoxan-2-yl]oxy-12-hydroxy-4,4,8,10,14-pentamethyl-2,3,5,6,7,9,11,12,13,15,1 | C <sub>48</sub> H <sub>82</sub> O <sub>18</sub>  | 52705-93-8 |
| 40 | HS | Ginsenoside Re                                                                                                                                                                                                                                                  | C <sub>48</sub> H <sub>82</sub> O <sub>18</sub>  | 52286-59-6 |
| 41 | HS | (3S,5R,6S,8R,9R,10R,12R,13R,14R,17S)-17-[(2R)-2-hydroxy-6-methylhept-5-en-2-yl]-4,4,8,10,14-pentamethyl-2,3,5,6,7,9,11,12,13,15,16,17-dodecahydro-1H-cyclopenta[a]phenanthrene-3,6,12-triol                                                                     | C <sub>30</sub> H <sub>52</sub> O <sub>4</sub>   | 1453-93-6  |
| 42 | HS | Sanchinoside C1                                                                                                                                                                                                                                                 | C <sub>42</sub> H <sub>72</sub> O <sub>14</sub>  | 22427-39-0 |
| 43 | HS | ginsenoside rh2                                                                                                                                                                                                                                                 | C <sub>36</sub> H <sub>62</sub> O <sub>8</sub>   | 78214-33-2 |
| 44 | HS | notoginsenoside R2                                                                                                                                                                                                                                              | C <sub>41</sub> H <sub>70</sub> O <sub>13</sub>  | 80418-25-3 |
| 45 | HS | notoginsenoside R2_qt                                                                                                                                                                                                                                           | C <sub>41</sub> H <sub>70</sub> O <sub>13</sub>  | 80418-25-3 |
| 46 | HS | β-guaiene                                                                                                                                                                                                                                                       | C <sub>15</sub> H <sub>24</sub>                  | 88-84-6    |
| 47 | HS | (2R,3R,4S,5S,6R)-2-[[[(3S,5R,6S,8R,9R,10R,12R,13R,14R,17S)-3,12-dihydroxy-17-[(2S)-2-hydroxy-6-methylhept-5-en-2-yl]-4,4,8,10,14-pentamethyl-2,3,5,6,7,9,11,12,13,15,16,17-dodecahydro-1H-cyclopenta[a]phenanthren-6-yl]oxy]-6-(hydroxymethyl)oxane-3,4,5-triol | C <sub>36</sub> H <sub>62</sub> O <sub>9</sub>   | 63223-86-9 |
| 48 | HS | panaxydol                                                                                                                                                                                                                                                       | C <sub>17</sub> H <sub>24</sub> O <sub>2</sub>   | 72800-72-7 |
| 49 | HS | NSC692928                                                                                                                                                                                                                                                       | C <sub>17</sub> H <sub>24</sub> O                | 81203-57-8 |
| 50 | HS | ginsenoside rf                                                                                                                                                                                                                                                  | C <sub>42</sub> H <sub>72</sub> O <sub>14</sub>  | 52286-58-5 |
| 51 | HS | β-cedrene                                                                                                                                                                                                                                                       | C <sub>15</sub> H <sub>24</sub>                  | 546-28-1   |
| 52 | HS | (butylsulfonyl)ethynylbenzene                                                                                                                                                                                                                                   | C <sub>12</sub> H <sub>14</sub> O <sub>2</sub> S | NA         |

|    |    |                                                                                     |                                                               |             |
|----|----|-------------------------------------------------------------------------------------|---------------------------------------------------------------|-------------|
| 53 | HS | 1-ethenyl-1-methyl-2-(1-methylethenyl)-4-(isopropyl)-cyclohexane                    | NA                                                            | NA          |
| 54 | HS | Agidol 7                                                                            | C <sub>25</sub> H <sub>36</sub> O <sub>2</sub>                | 88-24-4     |
| 55 | HS | 20(S)-ginsenoside Rg3                                                               | C <sub>42</sub> H <sub>72</sub> O <sub>13</sub>               | 14197-60-5  |
| 56 | HS | 20(S)-ginsenoside Rg3_qt                                                            | C <sub>42</sub> H <sub>72</sub> O <sub>13</sub>               | 14197-60-5  |
| 57 | HS | ginsenoside R0                                                                      | C <sub>48</sub> H <sub>76</sub> O <sub>19</sub>               | 34367-04-9  |
| 58 | HS | ginsenoside R0_qt                                                                   | C <sub>48</sub> H <sub>76</sub> O <sub>19</sub>               | 34367-04-9  |
| 59 | HS | ginsenoside Rg2                                                                     | C <sub>42</sub> H <sub>72</sub> O <sub>13</sub>               | 52286-74-5  |
| 60 | HS | ginsenoside Rg2_qt                                                                  | C <sub>42</sub> H <sub>72</sub> O <sub>13</sub>               | 52286-74-5  |
| 61 | HS | ginsenoside Rg3                                                                     | C <sub>42</sub> H <sub>72</sub> O <sub>13</sub>               | 14197-60-5  |
| 62 | HS | ginsenoside Rg3_qt                                                                  | C <sub>42</sub> H <sub>72</sub> O <sub>13</sub>               | 14197-60-5  |
| 63 | HS | ginsenoside Rh4                                                                     | C <sub>36</sub> H <sub>60</sub> O <sub>8</sub>                | 174721-08-5 |
| 64 | HS | ginsenoside Rh4_qt                                                                  | C <sub>36</sub> H <sub>60</sub> O <sub>8</sub>                | 174721-08-5 |
| 65 | HS | ginsenoside Rs1                                                                     | C <sub>55</sub> H <sub>92</sub> O <sub>23</sub>               | 87733-67-3  |
| 66 | HS | ginsenoside Rs1_qt                                                                  | C <sub>55</sub> H <sub>92</sub> O <sub>23</sub>               | 87733-67-3  |
| 67 | HS | globulol                                                                            | C <sub>15</sub> H <sub>26</sub> O                             | 489-41-8    |
| 68 | HS | O-isoprenyl benzophenone                                                            | C <sub>18</sub> H <sub>18</sub> O                             | NA          |
| 69 | HS | p-tert-Butylanisole                                                                 | C <sub>11</sub> H <sub>16</sub> O                             | 5396-38-3   |
| 70 | HS | (3R,9R,10R)-heptadec-1-en-4,6-diyne-3,9,10-triol                                    | C <sub>17</sub> H <sub>26</sub> O <sub>3</sub>                | 87005-03-6  |
| 71 | HS | (4aR,9aS)-2,9,9-trimethyl-5-methylene-4,4a,6,7,8,9a-hexahydro-3H-benzo[7]annulene   | C <sub>15</sub> H <sub>24</sub>                               | 469-92-1    |
| 72 | HS | CLOVENE                                                                             | C <sub>15</sub> H <sub>24</sub>                               | 469-92-1    |
| 73 | MD | 1-Isopropyl-4-Methylcyclohex-3-Enol,4-Terpineol                                     | C <sub>10</sub> H <sub>18</sub> O                             | 562-74-3    |
| 74 | MD | 2'-Hydroxymethylpogonone A                                                          | C <sub>19</sub> H <sub>16</sub> O <sub>7</sub>                | N/A         |
| 75 | MD | 3,7-Dimethylocta-1,6-Dien-3-Ol,Linalol,Linalool                                     | C <sub>10</sub> H <sub>18</sub> O                             | 78-70-6     |
| 76 | MD | 5,7,2'-Trihydroxy-6-Methyl-3-(3',4'-Methylenedioxybenzyl) Chromone                  | C <sub>18</sub> H <sub>14</sub> O <sub>7</sub>                | N/A         |
| 77 | MD | 5,7-Dihydroxy-6,8-Dimethyl-3-(4'-Hydroxy-3'-Methoxybenzyl)Chroman-4-One             | C <sub>19</sub> H <sub>20</sub> O <sub>6</sub>                | N/A         |
| 78 | MD | 5-Hydroxy-7,8-Dimethoxy-6-Methyl-3-(3',4'-Dihydroxybenzyl) Chroman-4-One            | C <sub>19</sub> H <sub>20</sub> O <sub>7</sub>                |             |
| 79 | MD | 6-Aldehydo-Isoophiopogone A                                                         | C <sub>19</sub> H <sub>14</sub> O <sub>7</sub>                | 112500-90-0 |
| 80 | MD | 6-Aldehydo-Isoophiopogone B                                                         | C <sub>19</sub> H <sub>16</sub> O <sub>6</sub>                | N/A         |
| 81 | MD | Adenosine,Adenine Nucleoside<br>Alexandrin,Daucosterol,Caproic<br>Acid,Eletheroside | C <sub>10</sub> H <sub>13</sub> N <sub>5</sub> O <sub>4</sub> | 58-61-7     |
| 82 | MD | A,Sitogluside,Strumaroside,Î'-Sitosterol-Î'-D-Glucoside                             | C <sub>35</sub> H <sub>60</sub> O <sub>6</sub>                | 474-58-8    |
| 83 | MD | Borneol-2-O-Î'-L-Arabinofuranosyl(1â†'6)-Î'-D-Glucopyranoside                       | C <sub>21</sub> H <sub>36</sub> O <sub>10</sub>               | N/A         |
| 84 | MD | Borneol-2-O-Î'-D-Apiofuranosyl(1â†'6)-Î'-D-Glucopyranoside                          | C <sub>21</sub> H <sub>36</sub> O <sub>10</sub>               | N/A         |
| 85 | MD | Camphor                                                                             | C <sub>10</sub> H <sub>16</sub> O                             | 76-22-2     |

|     |    |                                                                                           |                                                  |             |
|-----|----|-------------------------------------------------------------------------------------------|--------------------------------------------------|-------------|
| 86  | MD | Cyperene                                                                                  | C <sub>15</sub> H <sub>24</sub>                  | 2387-78-2   |
| 87  | MD | Glycerol                                                                                  | C <sub>3</sub> H <sub>8</sub> O <sub>3</sub>     | 56-81-5     |
| 88  | MD | Guaiol                                                                                    | C <sub>15</sub> H <sub>26</sub> O                | 489-86-1    |
| 89  | MD | Alpha-Humulene, Humulene, Î <sup>+</sup> -Humulene                                        | C <sub>15</sub> H <sub>24</sub>                  | 6753-98-6   |
| 90  | MD | Î <sup>+</sup> -Cyperene                                                                  | C <sub>15</sub> H <sub>24</sub>                  | 2387-78-2   |
| 91  | MD | Î <sup>+</sup> -Patchoulene                                                               | C <sub>15</sub> H <sub>24</sub>                  | 514-51-2    |
| 92  | MD | Isoophiopogonone A                                                                        | C <sub>18</sub> H <sub>16</sub> O <sub>6</sub>   | N/A         |
| 93  | MD | Jasmololone                                                                               | C <sub>11</sub> H <sub>16</sub> O <sub>2</sub>   | 93221-50-2  |
| 94  | MD | Jasmololone1                                                                              | C <sub>11</sub> H <sub>16</sub> O <sub>2</sub>   | 54383-66-3  |
| 95  | MD | Longifolene                                                                               | C <sub>15</sub> H <sub>24</sub>                  | 475-20-7    |
| 96  | MD | Methyl Ophiopogonanone A                                                                  | C <sub>19</sub> H <sub>18</sub> O <sub>6</sub>   | 74805-92-8  |
| 97  | MD | Methyl Ophiopogonanone B                                                                  | C <sub>19</sub> H <sub>20</sub> O <sub>5</sub>   | 74805-91-7  |
| 98  | MD | N-( Trans-P-Coumaroyl) Tyramine                                                           | C <sub>17</sub> H <sub>17</sub> NO <sub>3</sub>  | 36417-86-4  |
| 99  | MD | N-[Î <sup>+</sup> -Hydroxy-Î <sup>+</sup> -(4-Hydroxyphenyl)]Ethyl-4-Hydroxy Cinnamide    | C <sub>17</sub> H <sub>17</sub> NO <sub>4</sub>  | N/A         |
| 100 | MD | N-Trans-Feruloyltyramine                                                                  | C <sub>18</sub> H <sub>19</sub> NO <sub>4</sub>  | 66648-43-9  |
| 101 | MD | Oleanolic Acid                                                                            | C <sub>30</sub> H <sub>48</sub> O <sub>3</sub>   | 508-02-1    |
| 102 | MD | Ophiogenin-3-O-Î <sup>+</sup> -L-Rhamnopyranosyl(1â†'2)-Î <sup>+</sup> -D-Glucopyranoside | C <sub>39</sub> H <sub>62</sub> O <sub>14</sub>  | N/A         |
| 103 | MD | Ophiopogon A                                                                              | C <sub>44</sub> H <sub>70</sub> O <sub>18</sub>  | 288143-27-1 |
| 104 | MD | Ophiopogonanone A                                                                         | C <sub>18</sub> H <sub>16</sub> O <sub>6</sub>   | 75239-63-3  |
| 105 | MD | Ophiopogonanone B                                                                         | C <sub>18</sub> H <sub>18</sub> O <sub>5</sub>   | N/A         |
| 106 | MD | Ophiopogonanone C                                                                         | C <sub>19</sub> H <sub>16</sub> O <sub>7</sub>   | 477336-75-7 |
| 107 | MD | Ophiopogonanone D                                                                         | C <sub>20</sub> H <sub>18</sub> O <sub>7</sub>   | N/A         |
| 108 | MD | Ophiopogonanone E                                                                         | C <sub>19</sub> H <sub>20</sub> O <sub>7</sub>   | N/A         |
| 109 | MD | Ophiopogonanone F                                                                         | C <sub>20</sub> H <sub>22</sub> O <sub>7</sub>   | N/A         |
| 110 | MD | Ophiopogonin A                                                                            | C <sub>41</sub> H <sub>64</sub> O <sub>13</sub>  | 11054-24-3  |
| 111 | MD | Ophiopogonin B                                                                            | C <sub>39</sub> H <sub>62</sub> O <sub>12</sub>  | 38971-41-4  |
| 112 | MD | Ophiopogonin C'                                                                           | C <sub>39</sub> H <sub>62</sub> O <sub>12</sub>  | 19057-67-1  |
| 113 | MD | Ophiopogonin D                                                                            | C <sub>44</sub> H <sub>70</sub> O <sub>16</sub>  | 945619-74-9 |
| 114 | MD | Ophiopogonin D'                                                                           | C <sub>44</sub> H <sub>70</sub> O <sub>16</sub>  | 65604-80-0  |
| 115 | MD | Ophiopogonone C                                                                           | C <sub>19</sub> H <sub>14</sub> O <sub>7</sub>   | N/A         |
| 116 | MD | Ophiopogonoside A                                                                         | C <sub>21</sub> H <sub>38</sub> O <sub>8</sub>   | N/A         |
| 117 | MD | Ruscogenin                                                                                | C <sub>27</sub> H <sub>42</sub> O <sub>4</sub>   | 472-11-7    |
| 118 | MD | Ruscogenin 1-O-Sulfate                                                                    | C <sub>27</sub> H <sub>42</sub> O <sub>7</sub> S | N/A         |
| 119 | MD | Stigmasterol                                                                              | C <sub>29</sub> H <sub>48</sub> O                | 481-16-3    |

**Abbreviations:** HS, Hongshen; MD, Maidong; N/A, not available.

**Supplementary Table 3. Compound-related targets, disease-related targets, potential therapeutic targets**

| No. | 770 compounds-related targets | 610 AP-related targets | 59 potential therapeutic targets |
|-----|-------------------------------|------------------------|----------------------------------|
| 1   | PPARA                         | REG3A                  | CA2                              |
| 2   | PPARD                         | KIT                    | ADH1C                            |
| 3   | FABP2                         | CX3CL1                 | VDR                              |
| 4   | FFAR1                         | BIRC5                  | NR1H4                            |
| 5   | HSD11B1                       | MTNR1B                 | NOS2                             |
| 6   | SLC22A6                       | LMNA                   | HMOX1                            |
| 7   | FABP4                         | TNF                    | PTGS2                            |
| 8   | FABP5                         | LMF1                   | JAK2                             |
| 9   | AR                            | BSCL2                  | TYMS                             |
| 10  | VDR                           | NSMCE2                 | FABP1                            |
| 11  | POLB                          | GPIHBP1                | TERT                             |
| 12  | GPBAR1                        | AGPAT2                 | FABP4                            |
| 13  | AKR1B10                       | SPINK1                 | TLR9                             |
| 14  | FABP3                         | CD14                   | DPP4                             |
| 15  | CDC25A                        | TLR4                   | HSPA1A                           |
| 16  | NR1H4                         | IL1A                   | MMP9                             |
| 17  | KDM2A                         | IL10                   | MMP2                             |
| 18  | PHF8                          | IL1B                   | MMP1                             |
| 19  | KDM5C                         | CCL2                   | BRAF                             |
| 20  | UGT2B7                        | CFTR                   | ALDH2                            |
| 21  | CYP19A1                       | PRSS1                  | MMP3                             |
| 22  | SERPINA6                      | IL6                    | MMP8                             |
| 23  | SHBG                          | MIR216A                | MMP7                             |
| 24  | HSD17B3                       | HSPA1B                 | TNF                              |
| 25  | G6PD                          | ADH1B                  | MIF                              |
| 26  | GABBR1                        | PTGS2                  | SHH                              |
| 27  | PTGFR                         | HSPA2                  | KIT                              |
| 28  | GABRA2                        | HSPA1A                 | MET                              |
| 29  | GABRB2                        | IL1RN                  | CTSB                             |
| 30  | GABRG2                        | TP53INP1               | CFTR                             |
| 31  | PTGER2                        | CARD9                  | VEGFA                            |
| 32  | HSD11B2                       | HMOX1                  | STAT3                            |
| 33  | HAO1                          | ALDH2                  | MME                              |
| 34  | NPC1L1                        | IL33                   | FGFR1                            |
| 35  | CA2                           | TNFAIP3                | SELE                             |
| 36  | CA1                           | VMP1                   | MTNR1B                           |
| 37  | PLG                           | TLR2                   | SERPINE1                         |
| 38  | GSTK1                         | TGFB1                  | BCL2                             |
| 39  | LTA4H                         | RIPK3                  | RIPK2                            |

|    |          |        |         |
|----|----------|--------|---------|
| 40 | CDC45    | TAC1   | FOXO1   |
| 41 | PTPRC    | STAT3  | KCNA3   |
| 42 | FNTA     | MIR375 | COMT    |
| 43 | FNTB     | SNAP25 | F3      |
| 44 | CACNA2D1 | SMAD7  | MPO     |
| 45 | PSEN2    | PLA2G7 | IL6     |
| 46 | PSENE1   | GALR3  | PLA2G2A |
| 47 | NCSTN    | OR10A4 | REN     |
| 48 | APH1A    | MPRIP  | PRKCA   |
| 49 | PSEN1    | MBL3P  | ACE     |
| 50 | APH1B    | GAL    | FABP2   |
| 51 | CHRNA7   | TLR9   | PTPRC   |
| 52 | PLA2G10  | PROCR  | ICAM1   |
| 53 | FOLH1    | TREM1  | ITGB2   |
| 54 | SAE1     | TLR6   | GCG     |
| 55 | UBA2     | PARD3  | FLT1    |
| 56 | GRM5     | TIGAR  | PLA2G7  |
| 57 | FDFT1    | NR1H4  | AGPAT2  |
| 58 | EPHX2    | MAGI2  | ERBB2   |
| 59 | PTGES    | AIM2   | P2RX7   |
| 60 | CNR2     | GALR2  |         |
| 61 | FAAH     | KMO    |         |
| 62 | TRPV1    | TYMS   |         |
| 63 | PTPN1    | AGT    |         |
| 64 | NR0B2    | F5     |         |
| 65 | PPARG    | FCGR3A |         |
| 66 | RXRA     | FCGR3B |         |
| 67 | CYP26A1  | FGFR1  |         |
| 68 | CYP26B1  | FUT2   |         |
| 69 | RARG     | GSTM1  |         |
| 70 | RARB     | GSTT1  |         |
| 71 | RARA     | ACE    |         |
| 72 | TERT     | ERBB2  |         |
| 73 | FABP1    | EGF    |         |
| 74 | FFAR4    | APOE   |         |
| 75 | RXRG     | BCL2   |         |
| 76 | ALOX15   | BCL3   |         |
| 77 | ALOX12   | CAT    |         |
| 78 | PTGER4   | CPB1   |         |
| 79 | RXRB     | CTSB   |         |
| 80 | SLC16A1  | DECR1  |         |
| 81 | GLRA1    | EDN1   |         |
| 82 | ABCC1    | ICAM1  |         |
| 83 | ABCB1    | CXCL8  |         |

|     |         |          |  |
|-----|---------|----------|--|
| 84  | HMGCR   | JAK2     |  |
| 85  | TBXA2R  | SERPINA1 |  |
| 86  | PLA2G4A | PLA2G2A  |  |
| 87  | SCD     | PRH2     |  |
| 88  | HTR2B   | PRSS3    |  |
| 89  | RORB    | PTHLH    |  |
| 90  | MAPK1   | PTPRC    |  |
| 91  | RORA    | RAC1     |  |
| 92  | HNF4A   | REN      |  |
| 93  | CXCR3   | SERPINE1 |  |
| 94  | NR1I3   | P2RX7    |  |
| 95  | NR1H3   | LTA      |  |
| 96  | RORC    | MBL2     |  |
| 97  | CYP51A1 | MEFV     |  |
| 98  | CYP17A1 | MPO      |  |
| 99  | SREBF2  | MTHFR    |  |
| 100 | ESR1    | MYO9B    |  |
| 101 | ESR2    | NFKB1    |  |
| 102 | CYP2C19 | NFKBIA   |  |
| 103 | SLC6A2  | S100A9   |  |
| 104 | ACHE    | HMGCL    |  |
| 105 | BCHE    | MME      |  |
| 106 | SLC6A4  | Reg3b    |  |
| 107 | CHRM2   | Knq2     |  |
| 108 | NR1H2   | Reg3g    |  |
| 109 | DHCR7   | PRSS2    |  |
| 110 | PTGER1  | KRAS     |  |
| 111 | TBXAS1  | CDKN2A   |  |
| 112 | CES2    | TERT     |  |
| 113 | SQLE    | CTRC     |  |
| 114 | PTPN6   | SAA1     |  |
| 115 | PTPN2   | CST3     |  |
| 116 | NOS2    | CRP      |  |
| 117 | GLI2    | CLDN2    |  |
| 118 | GLI1    | Nlrp3    |  |
| 119 | CTSD    | KCNA3    |  |
| 120 | SRD5A1  | CALCA    |  |
| 121 | SRD5A2  | ABO      |  |
| 122 | NR3C2   | HLA-DRB1 |  |
| 123 | NR3C1   | Tacr1    |  |
| 124 | PGR     | HMGB1    |  |
| 125 | SIGMAR1 | SPP1     |  |
| 126 | NR1I2   | MMP9     |  |
| 127 | CDC25B  | GSTP1    |  |



|     |          |          |  |
|-----|----------|----------|--|
| 128 | POLA1    | Pparg    |  |
| 129 | SHH      | RETN     |  |
| 130 | TRPM8    | LCN2     |  |
| 131 | CA4      | LEP      |  |
| 132 | IDO1     | IFNG     |  |
| 133 | TRPA1    | TIMP1    |  |
| 134 | SLC22A12 | Mapk14   |  |
| 135 | IMPDH2   | ANGPT2   |  |
| 136 | PTGDR2   | F3       |  |
| 137 | RBP4     | SBDS     |  |
| 138 | ADRA2B   | ADIPOQ   |  |
| 139 | MAPK14   | Rela     |  |
| 140 | PTGDR    | HAMP     |  |
| 141 | BCL2L1   | CD44     |  |
| 142 | CMA1     | S100A8   |  |
| 143 | CTSG     | IL18     |  |
| 144 | MDM2     | ELANE    |  |
| 145 | EDNRA    | Adcyap1  |  |
| 146 | PTGER3   | AGER     |  |
| 147 | KEAP1    | LPL      |  |
| 148 | PTGES2   | Fasl     |  |
| 149 | AKR1C3   | PLAUR    |  |
| 150 | OXER1    | MMP2     |  |
| 151 | AKR1C1   | IL2RA    |  |
| 152 | ITGAL    | IL17A    |  |
| 153 | ICAM1    | VEGFA    |  |
| 154 | ITGB2    | MIR21    |  |
| 155 | SPHK2    | CD163    |  |
| 156 | GCG      | Cxcr2    |  |
| 157 | ERN1     | SRP54    |  |
| 158 | EPHX1    | MIF      |  |
| 159 | MKNK1    | CEL      |  |
| 160 | PTGS1    | MIR146A  |  |
| 161 | PREP     | COMT     |  |
| 162 | TOP1     | DNAJC21  |  |
| 163 | LTB4R    | CHI3L1   |  |
| 164 | PDE4D    | PTX3     |  |
| 165 | CNR1     | TNFSF13B |  |
| 166 | PTGS2    | GDF15    |  |
| 167 | PTPRF    | CD274    |  |
| 168 | ALOX5    | Myd88    |  |
| 169 | PLA2G1B  | PON1     |  |
| 170 | PTGIR    | CTLA4    |  |
| 171 | CD81     | Ghrl     |  |

|     |         |          |  |
|-----|---------|----------|--|
| 172 | PRKCH   | FOXP3    |  |
| 173 | ACP1    | Nfe2l2   |  |
| 174 | ADORA3  | CYP1A1   |  |
| 175 | PTPN11  | Notch1   |  |
| 176 | MAPK3   | TNFSF10  |  |
| 177 | TOP2A   | Tnfrsf1a |  |
| 178 | BACE1   | NOS2     |  |
| 179 | SLC6A3  | UBR1     |  |
| 180 | PIM2    | Egfr     |  |
| 181 | ENPP2   | ALB      |  |
| 182 | THRA    | MMP8     |  |
| 183 | THRB    | FLT1     |  |
| 184 | MCL1    | MIR155   |  |
| 185 | BCL2    | Gsk3b    |  |
| 186 | OPRM1   | VDR      |  |
| 187 | OPRD1   | CXCL10   |  |
| 188 | OPRK1   | ADAMTS13 |  |
| 189 | PGGT1B  | Trpv1    |  |
| 190 | PER2    | NRAS     |  |
| 191 | EIF2AK1 | SELP     |  |
| 192 | PABPC1  | TIMP2    |  |
| 193 | CASR    | Mtor     |  |
| 194 | ICMT    | IL21     |  |
| 195 | HRH3    | Fas      |  |
| 196 | GCGR    | AVP      |  |
| 197 | CHRM1   | F2rl1    |  |
| 198 | CHRM3   | Chrna7   |  |
| 199 | ABHD6   | MIR29A   |  |
| 200 | PTPN22  | Trpa1    |  |
| 201 | MGLL    | Il22     |  |
| 202 | CHRM4   | IL1RL1   |  |
| 203 | CHRM5   | FABP1    |  |
| 204 | SMO     | IL23R    |  |
| 205 | ACACB   | Ctnnb1   |  |
| 206 | C5AR1   | Cxcr3    |  |
| 207 | GRM2    | HGF      |  |
| 208 | PRKCD   | CYP2E1   |  |
| 209 | TSPO    | FGF21    |  |
| 210 | PRKCA   | CD4      |  |
| 211 | SLC2A1  | MIR126   |  |
| 212 | SLC2A3  | Egr1     |  |
| 213 | SLC2A2  | NEWENTRY |  |
| 214 | CRHR1   | Alox5    |  |
| 215 | PDE10A  | Ccr2     |  |

|     |         |          |  |
|-----|---------|----------|--|
| 216 | OXTR    | TLR3     |  |
| 217 | F2R     | Ppargc1a |  |
| 218 | CAPN1   | MIR34A   |  |
| 219 | ABL1    | HSPA4    |  |
| 220 | AVPR1A  | Mapk3    |  |
| 221 | AVPR1B  | Mapk1    |  |
| 222 | KCNK2   | PROC     |  |
| 223 | NOD1    | Agtr1a   |  |
| 224 | NOD2    | BRAF     |  |
| 225 | CDK5R1  | Socs3    |  |
| 226 | CDK5    | Oprm1    |  |
| 227 | DYRK1A  | PDGFB    |  |
| 228 | C3AR1   | Lbp      |  |
| 229 | MAPK11  | Ngf      |  |
| 230 | FLT1    | SOD1     |  |
| 231 | PDGFRB  | Nupr1    |  |
| 232 | KIT     | Atf3     |  |
| 233 | PDE2A   | Ace2     |  |
| 234 | CTSK    | TNFRSF9  |  |
| 235 | CTSL    | Ahr      |  |
| 236 | CTSB    | AHSG     |  |
| 237 | PDE1B   | DPP4     |  |
| 238 | CASP3   | APOA5    |  |
| 239 | CASP6   | Pik3cg   |  |
| 240 | CASP7   | MMP7     |  |
| 241 | CYP24A1 | SELE     |  |
| 242 | CCR8    | Ikbkb    |  |
| 243 | CASP1   | ANGPT1   |  |
| 244 | DCK     | Reg1a    |  |
| 245 | FKBP1A  | Bdkrb2   |  |
| 246 | AGTR1   | CXCL16   |  |
| 247 | MDM4    | THPO     |  |
| 248 | CYP11B1 | MUC1     |  |
| 249 | P2RY12  | MMP1     |  |
| 250 | PTAFR   | Txn1     |  |
| 251 | CYP11B2 | MMP3     |  |
| 252 | CTSS    | FOXO1    |  |
| 253 | BRD4    | ENG      |  |
| 254 | BRD2    | ITGB2    |  |
| 255 | BRD3    | CD38     |  |
| 256 | HTR1A   | Ido1     |  |
| 257 | AKT1    | KRT18    |  |
| 258 | ALOX5AP | DEFB1    |  |
| 259 | LCK     | Mir21a   |  |

|     |          |          |
|-----|----------|----------|
| 260 | PIK3CD   | Mapk8    |
| 261 | MTNR1A   | Ppara    |
| 262 | MTNR1B   | TNFSF12  |
| 263 | GABRB3   | GAS6     |
| 264 | GABRA1   | Aqp1     |
| 265 | PARP1    | Adra2a   |
| 266 | IDH1     | ICOS     |
| 267 | TRPV4    | Faslg    |
| 268 | PORCN    | Hspb1    |
| 269 | PDE5A    | HLA-DQB1 |
| 270 | HCRTR2   | Mir214   |
| 271 | HCRTR1   | Glp1r    |
| 272 | DNM1     | SOD2     |
| 273 | CETP     | Cdh1     |
| 274 | DAO      | Cdkn1a   |
| 275 | DBH      | MIR551B  |
| 276 | SCN4A    | SHH      |
| 277 | HTR2A    | Tnfrsf1b |
| 278 | STAT3    | Casp3    |
| 279 | IL2      | CDX2     |
| 280 | HSP90AA1 | APOA2    |
| 281 | VEGFA    | FABP4    |
| 282 | FGF1     | Atg7     |
| 283 | FGF2     | Ucp2     |
| 284 | HPSE     | FABP2    |
| 285 | ATP1A1   | Traf6    |
| 286 | SLC5A2   | CPA1     |
| 287 | SLC5A1   | GPT      |
| 288 | HDAC6    | Postn    |
| 289 | HDAC1    | Cxcr4    |
| 290 | HDAC4    | Cacna1c  |
| 291 | SLC28A2  | Hspa5    |
| 292 | F7       | MASP2    |
| 293 | REN      | Stat1    |
| 294 | LGALS4   | Lepr     |
| 295 | LGALS8   | Vip      |
| 296 | PIM1     | MIR24-1  |
| 297 | MTOR     | BRCA2    |
| 298 | CCR1     | Cx3cr1   |
| 299 | SLC18A3  | MET      |
| 300 | F2       | Casp1    |
| 301 | TYMS     | Irf5     |
| 302 | ATP12A   | Ptpn1    |
| 303 | P2RX3    | Ifnar1   |

|     |          |           |  |
|-----|----------|-----------|--|
| 304 | TTL      | PPY       |  |
| 305 | MMP3     | Sox9      |  |
| 306 | MMP1     | PRKCA     |  |
| 307 | MMP2     | FGL2      |  |
| 308 | MMP7     | Cd276     |  |
| 309 | CYP2C9   | HLA-DQA1  |  |
| 310 | ALK      | LGALS1    |  |
| 311 | GPR55    | TF        |  |
| 312 | GPR18    | Cd40lg    |  |
| 313 | GSK3B    | HSF1      |  |
| 314 | GSK3A    | CHGA      |  |
| 315 | SORD     | TNFRSF10B |  |
| 316 | LIMK1    | Prkcd     |  |
| 317 | AURKA    | Smad2     |  |
| 318 | PIK3CA   | Trpv4     |  |
| 319 | COL4A3BP | A2M       |  |
| 320 | CCNB3    | Hc        |  |
| 321 | CDK1     | GCH1      |  |
| 322 | CCNB1    | Thbs1     |  |
| 323 | CCNB2    | TGFA      |  |
| 324 | MAPK8    | TNFRSF10A |  |
| 325 | CHEK1    | Cxcl12    |  |
| 326 | PDK1     | Gjb1      |  |
| 327 | LGALS3   | MGP       |  |
| 328 | JAK3     | Ednra     |  |
| 329 | KDR      | Xdh       |  |
| 330 | CYP27B1  | S100A12   |  |
| 331 | INSR     | PYY       |  |
| 332 | PDE4B    | Ikbkg     |  |
| 333 | PIK3CB   | GREM1     |  |
| 334 | PIK3CG   | Pecam1    |  |
| 335 | SCN9A    | SST       |  |
| 336 | DRD1     | Trpc3     |  |
| 337 | DRD2     | Capn1     |  |
| 338 | DRD3     | Nod2      |  |
| 339 | PPP1CC   | SH2B3     |  |
| 340 | PPP2CA   | Cck       |  |
| 341 | CYP2D6   | Cacna1b   |  |
| 342 | CYP3A4   | Fgf10     |  |
| 343 | CAPN2    | Bhlha15   |  |
| 344 | CCNC     | Gnaq      |  |
| 345 | CDK8     | Agtr1b    |  |
| 346 | PCSK7    | Ly6c1     |  |
| 347 | PYGL     | YAP1      |  |

|     |         |          |  |
|-----|---------|----------|--|
| 348 | JAK1    | Lum      |  |
| 349 | JAK2    | Stat6    |  |
| 350 | CALCRL  | APOC3    |  |
| 351 | PTK6    | CBS      |  |
| 352 | IL6ST   | GCG      |  |
| 353 | MET     | Ticam1   |  |
| 354 | CCNT1   | LIPC     |  |
| 355 | CCR2    | IFNA1    |  |
| 356 | PGC     | Cnr2     |  |
| 357 | CHEK2   | Ccn2     |  |
| 358 | CTSE    | Cav1     |  |
| 359 | PGA5    | Atg5     |  |
| 360 | ADORA1  | RACK1    |  |
| 361 | ADORA2A | GGT1     |  |
| 362 | ADORA2B | PROS1    |  |
| 363 | TACR2   | Col1a1   |  |
| 364 | IGF1R   | UMOD     |  |
| 365 | PFKFB3  | Sqstm1   |  |
| 366 | S1PR1   | IL24     |  |
| 367 | MAP2K1  | KRT8     |  |
| 368 | BCL2A1  | Dusp1    |  |
| 369 | ADK     | Prkcz    |  |
| 370 | MAP3K14 | Extl3    |  |
| 371 | KDM5A   | Itgal    |  |
| 372 | EGFR    | Clu      |  |
| 373 | SCN5A   | Ephx2    |  |
| 374 | GRM1    | APOC2    |  |
| 375 | PDE7A   | SKI      |  |
| 376 | NTRK1   | Tnfrsf18 |  |
| 377 | ASAHI   | Mapkapk2 |  |
| 378 | CA12    | Cth      |  |
| 379 | CA9     | Nqo1     |  |
| 380 | PLA2G7  | Mas1     |  |
| 381 | FGFR1   | Cckar    |  |
| 382 | PIM3    | RNLS     |  |
| 383 | ALPL    | Aqp5     |  |
| 384 | TYK2    | IRF2     |  |
| 385 | SYK     | Il15     |  |
| 386 | S1PR3   | MIR193B  |  |
| 387 | AGPAT2  | JAM3     |  |
| 388 | ERBB2   | PNLIP    |  |
| 389 | KARS    | Ifitm3   |  |
| 390 | CDK2    | Ctsc     |  |
| 391 | CCNA1   | Atp2a1   |  |

|     |        |         |  |
|-----|--------|---------|--|
| 392 | CCNA2  | Vamp8   |  |
| 393 | CCR9   | Btc     |  |
| 394 | CXCR2  | Tacr2   |  |
| 395 | CXCR1  | Napa    |  |
| 396 | GABRA5 | Vasp    |  |
| 397 | MAP3K5 | Mir9-1  |  |
| 398 | GRIN2A | RHOA    |  |
| 399 | GRIN1  | Mir542  |  |
| 400 | F10    | STIM1   |  |
| 401 | GRIA2  | CD24    |  |
| 402 | DUT    | TLR7    |  |
| 403 | CPT1A  | Bace1   |  |
| 404 | LYPLA2 | CA2     |  |
| 405 | P2RX7  | IL1R1   |  |
| 406 | MPO    | ZEB2    |  |
| 407 | ESRRG  | ADH1C   |  |
| 408 | HTR6   | Chuk    |  |
| 409 | HTR2C  | Alpl    |  |
| 410 | SIRT2  | STING1  |  |
| 411 | CFTR   | ABCB4   |  |
| 412 | TACR3  | Map3k14 |  |
| 413 | GABBR2 | CLDN4   |  |
| 414 | MAPT   | Mdk     |  |
| 415 | CCKBR  | AZGP1   |  |
| 416 | GLRA2  | Pak1    |  |
| 417 | JUN    | Kenma1  |  |
| 418 | PPM1A  | Hspd1   |  |
| 419 | PTPA   | Itrp2   |  |
| 420 | CES1   | RIPK2   |  |
| 421 | CDC25C | Tgfbr2  |  |
| 422 | EPHB4  | Map3k8  |  |
| 423 | INCENP | TNFAIP6 |  |
| 424 | AURKB  | SCARB2  |  |
| 425 | TTK    | Nfatc3  |  |
| 426 | ITK    | MMUT    |  |
| 427 | PRKCB  | Thbs2   |  |
| 428 | GABRA3 | Eif4e   |  |
| 429 | PDPK1  | Pdgfra  |  |
| 430 | TKT    | Rcan1   |  |
| 431 | CCR3   | Ptpn11  |  |
| 432 | CCND1  | Hdac2   |  |
| 433 | CDK4   | Ptafr   |  |
| 434 | CCNE2  | IGHE    |  |
| 435 | CCNE1  | Irak4   |  |

|     |         |           |
|-----|---------|-----------|
| 436 | RET     | TNFRSF10C |
| 437 | MMP9    | GOLGA2    |
| 438 | GRB2    | Ocln      |
| 439 | MKNK2   | Capn2     |
| 440 | FLT3    | Rab7      |
| 441 | DHFR    | Cast      |
| 442 | AKR1B1  | TNFRSF10D |
| 443 | MAOB    | Piezo1    |
| 444 | ABCB11  | SLC7A7    |
| 445 | CFD     | Gnai2     |
| 446 | PRF1    | Ryr1      |
| 447 | MAPK9   | Jak3      |
| 448 | CDK6    | Fgf7      |
| 449 | PAK1    | MIR127    |
| 450 | CSF1R   | Ptpn6     |
| 451 | IL6     | Ramp1     |
| 452 | GLUL    | SLC26A6   |
| 453 | APP     | MMAB      |
| 454 | MAST3   | Cxcl9     |
| 455 | PDE3A   | Itgam     |
| 456 | PDE3B   | Mir22     |
| 457 | GCK     | Vipr1     |
| 458 | KCNA3   | Mtnr1a    |
| 459 | LIMK2   | Ggps1     |
| 460 | FASN    | Reg2      |
| 461 | CDC7    | MMAA      |
| 462 | CDK9    | MMADHC    |
| 463 | AVPR2   | Hrg       |
| 464 | TACR1   | Nod1      |
| 465 | SLC10A2 | Nkx3-1    |
| 466 | MCHR1   | DEFB104A  |
| 467 | METAP2  | Pias2     |
| 468 | MAOA    | Eif2b5    |
| 469 | DUSP1   | Ii27      |
| 470 | KCNH2   | Hyou1     |
| 471 | KCNN4   | Eif2b1    |
| 472 | CCR5    | MCEE      |
| 473 | MC4R    | ARPIN     |
| 474 | G6PC    | Fntb      |
| 475 | HTR7    | Mir217    |
| 476 | DRD4    | Eppk1     |
| 477 | ADRA2A  | Kpna2     |
| 478 | HTR1B   | Mir135a   |
| 479 | ADRA2C  | Hbp1      |



|     |         |          |  |
|-----|---------|----------|--|
| 480 | HRH2    | Mir194-1 |  |
| 481 | HTR1D   | Mir181b1 |  |
| 482 | ADRA1D  | Mir194-2 |  |
| 483 | ADRA1A  | MTPA     |  |
| 484 | HSD17B2 | GNB1     |  |
| 485 | CHRNA4  | TAL1     |  |
| 486 | CHRN2   | CPT2     |  |
| 487 | KAT2B   | AIR      |  |
| 488 | CALM1   | RBM15    |  |
| 489 | ADH1A   | ABL2     |  |
| 490 | AOC3    | LPIN1    |  |
| 491 | HIF1A   | DNMT3A   |  |
| 492 | UPP1    | HADHA    |  |
| 493 | GYS1    | PAP      |  |
| 494 | HRAS    | RANBP2   |  |
| 495 | HSD17B1 | GATA2    |  |
| 496 | PLA2G2A | MLF1     |  |
| 497 | SELE    | LPP      |  |
| 498 | NR4A2   | CHIC2    |  |
| 499 | CBFB    | RAP1GDS1 |  |
| 500 | SLC5A4  | ACSL6    |  |
| 501 | CDK7    | IRF1     |  |
| 502 | PLK4    | NPM1     |  |
| 503 | STK16   | NSD1     |  |
| 504 | CLK4    | DEK      |  |
| 505 | CLK1    | MYB      |  |
| 506 | CLK2    | ALL2     |  |
| 507 | CLK3    | BLACE    |  |
| 508 | CDK3    | STAR     |  |
| 509 | CDK16   | NBN      |  |
| 510 | MAPK15  | BAALC    |  |
| 511 | CDK18   | LALL     |  |
| 512 | MAPK7   | PAX5     |  |
| 513 | DYRK1B  | TAL2     |  |
| 514 | CDK17   | ALAD     |  |
| 515 | PTK2    | SET      |  |
| 516 | CSNK1A1 | NUP214   |  |
| 517 | IRAK4   | AF10     |  |
| 518 | MAPK10  | ALL1     |  |
| 519 | ADH1C   | LMO1     |  |
| 520 | TRPV3   | LMO2     |  |
| 521 | HMOX1   | UNC93B1  |  |
| 522 | KCNA5   | NUMA1    |  |
| 523 | LRRK2   | PICALM   |  |

|     |         |         |  |
|-----|---------|---------|--|
| 524 | TNNC1   | ZBTB16  |  |
| 525 | TNNT2   | HMBS    |  |
| 526 | TNNI3   | ETV6    |  |
| 527 | HRH4    | KRAS,   |  |
| 528 | TLR9    | TBK1    |  |
| 529 | GRIK1   | MRD42   |  |
| 530 | GRIK2   | NAK     |  |
| 531 | DPP4    | FTDALS4 |  |
| 532 | HSPA8   | IIAE8   |  |
| 533 | HSPA5   | CLCR    |  |
| 534 | ADA     | TCL5    |  |
| 535 | AHCY    | SCL     |  |
| 536 | GAPDH   | TRY2    |  |
| 537 | EHMT1   | TEL     |  |
| 538 | EHMT2   | THC5    |  |
| 539 | SETD7   | IAE4    |  |
| 540 | AMD1    | KRAS2   |  |
| 541 | SRM     | RASK2   |  |
| 542 | PDCD4   | NSCFC2  |  |
| 543 | SRC     | RALD    |  |
| 544 | SLC29A1 | OES     |  |
| 545 | PNP     | SPEN    |  |
| 546 | SETD2   | OTT     |  |
| 547 | CARM1   | ABLL    |  |
| 548 | PRMT1   | ARG     |  |
| 549 | DOT1L   | TBR5    |  |
| 550 | GRK1    | HESJAS  |  |
| 551 | P2RY1   | PBGD    |  |
| 552 | P2RY11  | UPS     |  |
| 553 | MTAP    | ZNF145  |  |
| 554 | ROCK2   | PLZF    |  |
| 555 | PRKACA  | NUP358  |  |
| 556 | FBP1    | ANE1    |  |
| 557 | SMS     | IIAE3   |  |
| 558 | CDA     | CALM    |  |
| 559 | FHIT    | CLTH    |  |
| 560 | QARS    | LAP     |  |
| 561 | KMT2A   | DCML    |  |
| 562 | SUV39H1 | MONOMAC |  |
| 563 | DNMT1   | IMD21   |  |
| 564 | INMT    | ABCC7   |  |
| 565 | SMYD2   | CF      |  |
| 566 | EZH2    | MRP7    |  |
| 567 | EZH1    | IIAE1   |  |

|     |          |         |  |
|-----|----------|---------|--|
| 568 | SETDB1   | ALADH   |  |
| 569 | PNMT     | PBGS    |  |
| 570 | DNMT3B   | D9S46E  |  |
| 571 | MAPKAPK2 | CAN     |  |
| 572 | HSPA1A   | CAIN    |  |
| 573 | RARS     | IIAE9   |  |
| 574 | OGA      | BSAP    |  |
| 575 | CCND1    | ALL3    |  |
| 576 | GBA      | CD10    |  |
| 577 | GAA      | CALLA   |  |
| 578 | FUCA1    | NEP     |  |
| 579 | CA14     | CMT2T   |  |
| 580 | MARS     | SCA43   |  |
| 581 | PRMT7    | BTL     |  |
| 582 | PARG     | RBTN1   |  |
| 583 | IARS     | RHOM1   |  |
| 584 | TYR      | NBS1    |  |
| 585 | BRAF     | RBTN1   |  |
| 586 | WEE1     | RHOM2   |  |
| 587 | CDK5R1   | TTG2    |  |
| 588 | ALDH2    | MAR     |  |
| 589 | ESRRA    | THCYT3  |  |
| 590 | ESRRB    | MRD58   |  |
| 591 | PRKCZ    | TRY1    |  |
| 592 | RPS6KB1  | D6S231E |  |
| 593 | BMP1     | PBT     |  |
| 594 | DUSP3    | MASTC   |  |
| 595 | MMP8     | PSTI    |  |
| 596 | CA7      | PCTT    |  |
| 597 | CA6      | TATI    |  |
| 598 | CA5A     | TCP     |  |
| 599 | HPGDS    | IIAE2   |  |
| 600 | PDE4C    | FACL6   |  |
| 601 | ADAM17   | ACS2    |  |
| 602 | GRK2     | TCS1    |  |
| 603 | MMP13    | EST2    |  |
| 604 | TNF      | DKCA2   |  |
| 605 | ANPEP    | DKCB4   |  |
| 606 | MMP14    | PFBMFT1 |  |
| 607 | TRAP1    | CMM9    |  |
| 608 | HSP90B1  | ARA267  |  |
| 609 | HTR3A    | STO     |  |
| 610 | HSP90AB1 | SOTOS1  |  |
| 611 | VCP      |         |  |

|     |          |  |  |
|-----|----------|--|--|
| 612 | ADAM10   |  |  |
| 613 | CA13     |  |  |
| 614 | CA5B     |  |  |
| 615 | MIF      |  |  |
| 616 | EPHA2    |  |  |
| 617 | MMP16    |  |  |
| 618 | AKT2     |  |  |
| 619 | EPHB2    |  |  |
| 620 | EPHA5    |  |  |
| 621 | EPHA4    |  |  |
| 622 | EPHA8    |  |  |
| 623 | MMP12    |  |  |
| 624 | EPHA7    |  |  |
| 625 | EPHB3    |  |  |
| 626 | DYRK2    |  |  |
| 627 | DNASE1L3 |  |  |
| 628 | EGLN1    |  |  |
| 629 | NOX4     |  |  |
| 630 | IKBKB    |  |  |
| 631 | TNNC1    |  |  |
| 632 | NQO1     |  |  |
| 633 | SIRT1    |  |  |
| 634 | KDM3A    |  |  |
| 635 | KDM5B    |  |  |
| 636 | KDM4D    |  |  |
| 637 | KDM4C    |  |  |
| 638 | MME      |  |  |
| 639 | MAP3K9   |  |  |
| 640 | BTK      |  |  |
| 641 | ECE1     |  |  |
| 642 | IGFBP3   |  |  |
| 643 | DHODH    |  |  |
| 644 | MMP10    |  |  |
| 645 | PSEN2    |  |  |
| 646 | NCSTN    |  |  |
| 647 | AMPD3    |  |  |
| 648 | MYLK     |  |  |
| 649 | FYN      |  |  |
| 650 | YES1     |  |  |
| 651 | BLK      |  |  |
| 652 | CSK      |  |  |
| 653 | BMX      |  |  |
| 654 | LYN      |  |  |
| 655 | TXK      |  |  |

|     |             |  |  |
|-----|-------------|--|--|
| 656 | FGR         |  |  |
| 657 | EPHA6       |  |  |
| 658 | EPHA3       |  |  |
| 659 | TYRO3       |  |  |
| 660 | COQ8B       |  |  |
| 661 | EPHA1       |  |  |
| 662 | CYP1B1      |  |  |
| 663 | TTR         |  |  |
| 664 | SERPINE1    |  |  |
| 665 | NQO2        |  |  |
| 666 | RIPK2       |  |  |
| 667 | HSD17B14    |  |  |
| 668 | HDAC2       |  |  |
| 669 | HDAC8       |  |  |
| 670 | FOXO1       |  |  |
| 671 | ABCG2       |  |  |
| 672 | TAS2R31     |  |  |
| 673 | NFE2L2      |  |  |
| 674 | KLK2        |  |  |
| 675 | CBR1        |  |  |
| 676 | MT-ND4      |  |  |
| 677 | RAF1        |  |  |
| 678 | FOS JUN     |  |  |
| 679 | PLK1        |  |  |
| 680 | BACE2       |  |  |
| 681 | CA3         |  |  |
| 682 | COMT        |  |  |
| 683 | PAK4        |  |  |
| 684 | SLC9A1      |  |  |
| 685 | TGFBR1      |  |  |
| 686 | ACVR1       |  |  |
| 687 | TGM2        |  |  |
| 688 | KLK1        |  |  |
| 689 | GNRHR       |  |  |
| 690 | NCOR2 HDAC3 |  |  |
| 691 | FCER2       |  |  |
| 692 | PLAA        |  |  |
| 693 | PRKDC       |  |  |
| 694 | PGF         |  |  |
| 695 | TYMP        |  |  |
| 696 | ADAMTS5     |  |  |
| 697 | ADAMTS4     |  |  |
| 698 | ADAMTS1     |  |  |
| 699 | ROCK1       |  |  |

|     |            |  |  |
|-----|------------|--|--|
| 700 | EIF2AK3    |  |  |
| 701 | GAK        |  |  |
| 702 | F9         |  |  |
| 703 | LIPE       |  |  |
| 704 | MAP4K4     |  |  |
| 705 | LNPEP      |  |  |
| 706 | F3         |  |  |
| 707 | MAP3K8     |  |  |
| 708 | RPS6KA3    |  |  |
| 709 | CCNE2      |  |  |
| 710 | DYRK3      |  |  |
| 711 | ASF1A      |  |  |
| 712 | DBF4       |  |  |
| 713 | ADCY5      |  |  |
| 714 | EZR        |  |  |
| 715 | HDAC5      |  |  |
| 716 | HDAC7      |  |  |
| 717 | HDAC9      |  |  |
| 718 | MPEG1      |  |  |
| 719 | CHRNA3     |  |  |
| 720 | CHRNA4     |  |  |
| 721 | ABCC9      |  |  |
| 722 | KCNJ11     |  |  |
| 723 | CSNK2A1    |  |  |
| 724 | CSNK1D     |  |  |
| 725 | CSNK1E     |  |  |
| 726 | KCNE1      |  |  |
| 727 | KCNQ1      |  |  |
| 728 | F2RL3      |  |  |
| 729 | PRKCG      |  |  |
| 730 | NOS1       |  |  |
| 731 | ADAM9      |  |  |
| 732 | ATP4B      |  |  |
| 733 | ATP4A      |  |  |
| 734 | MELK       |  |  |
| 735 | TNKS2      |  |  |
| 736 | TNKS       |  |  |
| 737 | CDK1 CCNB1 |  |  |
| 738 | TUBB3      |  |  |
| 739 | OXSRI      |  |  |
| 740 | PIK3C2G    |  |  |
| 741 | YWHAG      |  |  |
| 742 | TRPM6      |  |  |
| 743 | PIP4K2C    |  |  |

|     |         |  |  |
|-----|---------|--|--|
| 744 | PIP5K1C |  |  |
| 745 | MAP2K3  |  |  |
| 746 | CSNK1G1 |  |  |
| 747 | PLA2G5  |  |  |
| 748 | MMP15   |  |  |
| 749 | MMP26   |  |  |
| 750 | PPM1B   |  |  |
| 751 | PPP2R5A |  |  |
| 752 | DBF4    |  |  |
| 753 | EIF2AK2 |  |  |
| 754 | HCK     |  |  |
| 755 | MMP25   |  |  |
| 756 | ALPG    |  |  |
| 757 | GRM4    |  |  |
| 758 | LIG1    |  |  |
| 759 | KCNMA1  |  |  |
| 760 | TUBB1   |  |  |
| 761 | CDK2    |  |  |
| 762 | PLA2G2C |  |  |
| 763 | AXL     |  |  |
| 764 | MERTK   |  |  |
| 765 | KLK3    |  |  |
| 766 | VHL     |  |  |
| 767 | RASGRP3 |  |  |
| 768 | ACE     |  |  |
| 769 | DGAT1   |  |  |
| 770 | ACPP    |  |  |

**Abbreviations:** AP, acute pancreatitis.

# Supplementary Figure 1

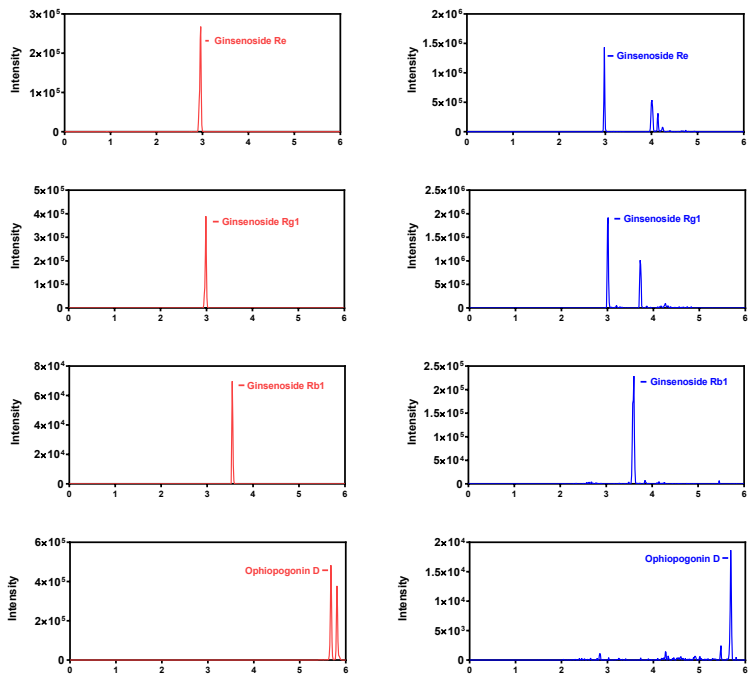

Supplementary figure 1 Extraction of ion chromatogram (EIC) of four components.
